# Supplementary material
Source: PubMed Central journal article supplement (PMC2785294)
Supplement: 0906597106_0906597106SI.pdf [file 0906597106_0906597106SI.pdf]

# Supporting Information

Perry et al. 10.1073/pnas.0906597106

## SI Methods

**Voltage Clamp.** Currents were recorded from oocytes 1–5 days after cRNA injection by using the two-electrode voltage-clamp technique (1). Agarose cushion microelectrodes were fabricated by filling borosilicate pipette tips with 1% agarose dissolved in 3 M KCl and then back-filling with 3 M KCl (2). Oocytes were voltage clamped to a holding potential of  $-110$  mV, and 3-s pulses to 0 mV were applied every 15 s until current magnitude reached a steady-state level. To determine the voltage dependence of inactivation, a 2-s prepulse to  $+40$  mV was followed by repolarization to a test potential ( $V_t$ ) that was varied from  $+30$  mV to  $-140$  mV and applied in 10-mV increments. The peak of the tail currents were then plotted as a function of  $V_t$  to obtain the fully activated  $I$ - $V$  relationship. Inward rectification of hERG1 was quantified by the deviation of the tail current amplitudes from the maximum slope conductance of the fully activated  $I$ - $V$  relationship, estimated from a linear fit of peak tail current values measured at  $V_t$  between  $-140$  and  $-110$  mV. Deviation of the  $I$ - $V$  relationships from linearity was corrected by the driving force for  $K^+$  ( $V_t - V_{rev}$ ) to obtain a rectification factor for each value of  $V_t$  (3). The plot of rectification factor versus  $V_t$  was fitted with a Boltzmann function to obtain the half-point ( $V_{0.5}$ ) and slope factor ( $k$ ) for the voltage dependence of hERG1 inactivation. Other voltage pulse protocols are described under *Results* and in the figure legends. After addition of PD-118057 to the bathing solution, 3-s pulses to 0 mV were applied every 15 s until a new steady-state level was achieved. Relevant voltage protocols were then repeated in the presence of drug.

Gating currents were measured using the cut-open oocyte Vaseline gap (COVG) method (4) as described previously (5).

Signals were low-pass filtered at 10 kHz and digitized at 40 kHz. Linear leak and capacitance currents were compensated by analog circuitry and subtracted online by using a p/8 protocol. Single hERG1 channel currents were measured in cell-attached patches, as described previously (6), using an Axopatch 200B amplifier (Molecular Devices, Sunnyvale, CA) and an electrode resistance of 8–15 M $\Omega$  when filled with pipette solution. Single channel current amplitudes were determined from analysis of all-points amplitude histograms of currents filtered at 1 kHz and digitized at 5 kHz.

**Molecular Modeling.** Modeling and docking were performed with the Insight II modules Homology, Builder, and Docking (version 8.2, Accelrys, San Diego, CA). The crystal structure of the mammalian Shaker Kv1.2 potassium channel subunit complex (PDB ID 2A79) and a previously published alignment for S6 and the SF (7) were used for creating a hERG1 homology model. The S5 alignment was based on assigning E575 to the C-terminal end of the domain. The PD-118057 structure was energy optimized. Interactions of the ligand with residues from two adjacent hERG1 subunits including their S4-S5 linker, S5, SF, and S6 were determined by molecular docking at a maximal distance of 15 Å from residue C643 in hERG1. The docking was initiated from random configurations ( $n = 200$ ) of the ligand. Residues of the hERG1 subunits and the ligand were flexible during the optimization procedure. The consistent valence force field (CVFF) was used to calculate conformational energies. Optimal configurations were determined by using simulated annealing techniques with an initial temperature of 400°K and a final temperature of 300°K followed by final minimization (steps = 1,000).

1. Stühmer W (1992) Electrophysiological recording from *Xenopus* oocytes. *Methods Enzymol* 207:319–339.
2. Schreibmayer W, Lester HA, Dascal N (1994) Voltage clamping of *Xenopus laevis* oocytes utilizing agarose-cushion electrodes. *Pflügers Arch* 426:453–458.
3. Sanguinetti MC, Jiang C, Curran ME, Keating MT (1995) A mechanistic link between an inherited and an acquired cardiac arrhythmia: *HERG* encodes the  $I_{Kr}$  potassium channel. *Cell* 81:299–307.
4. Stefani E, Bezanilla F (1998) *Methods in Enzymology*, ed. Conn PN (Academic, San Diego), pp. 300–318.
5. Piper DR, Varghese A, Sanguinetti MC, Tristani-Firouzi M (2003) Gating currents associated with intramembrane charge displacement in HERG potassium channels. *Proc Natl Acad Sci USA* 100:10534–10539.
6. Zou A, Curran ME, Keating MT, Sanguinetti MC (1997) Single HERG delayed rectifier  $K^+$  channels in *Xenopus* oocytes. *Am J Physiol* 272:H1309–H1314.
7. Perry M, Sachse FB, Sanguinetti MC (2007) Structural basis of action for a human ether-a-go-go-related gene 1 potassium channel activator. *Proc Natl Acad Sci USA* 104:13827–13832.





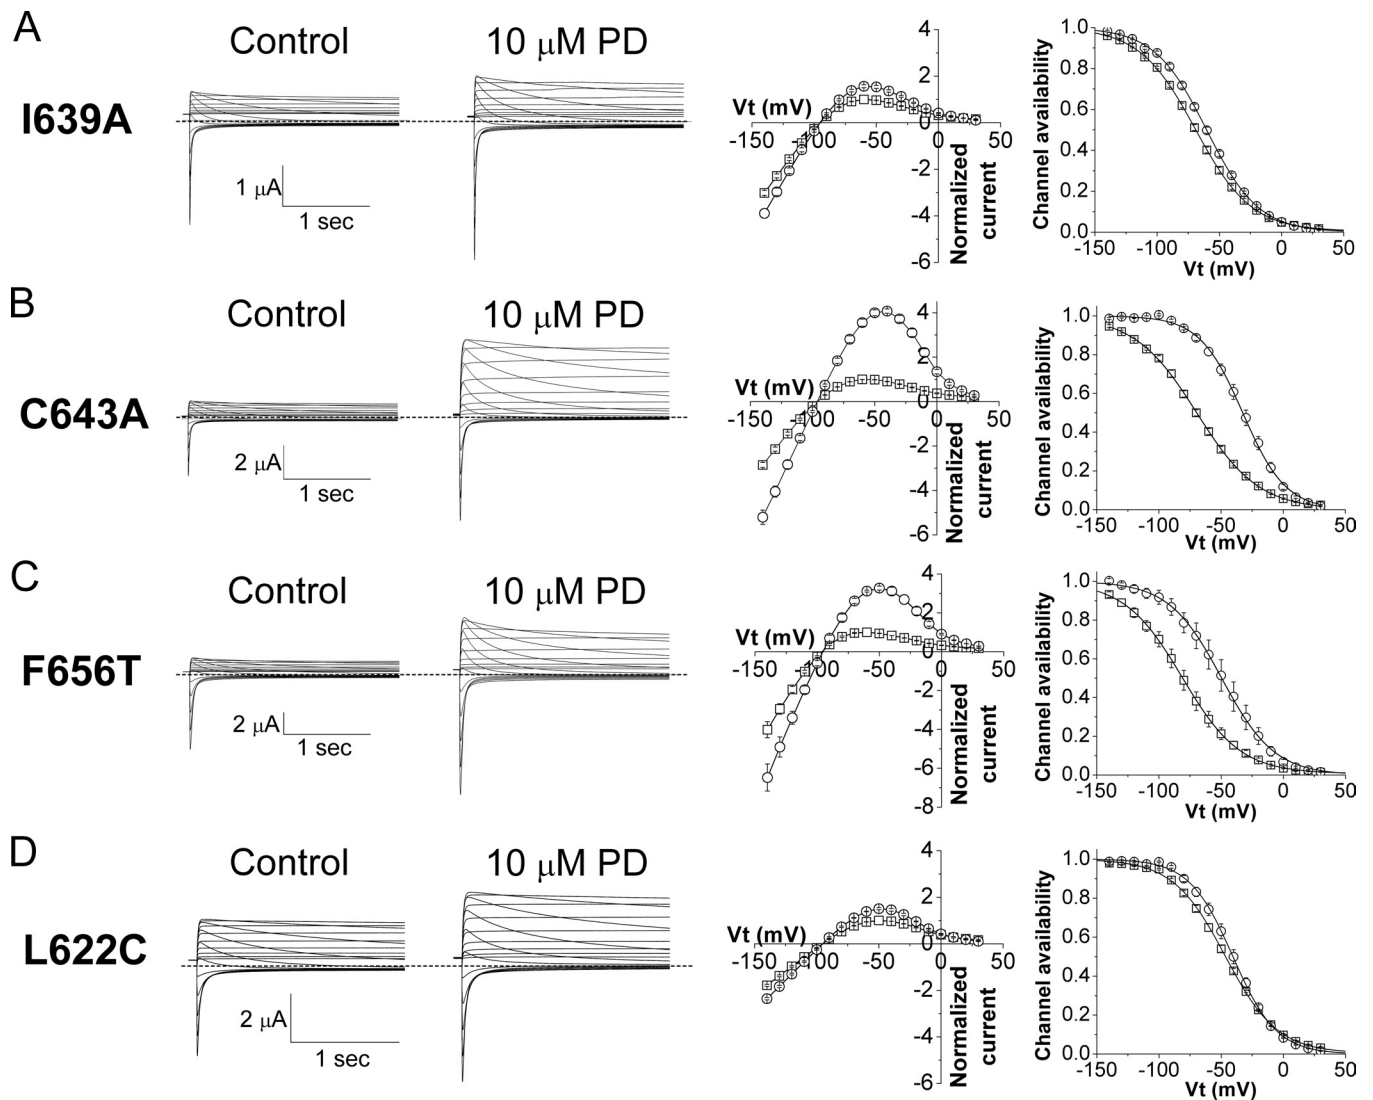

**Fig. S3.** Effect of PD-11807 on selected hERG1 mutant channels. (A-D) Current traces (elicited as described in Fig. 1A), mean fully activated *I-V* relationships, and corresponding voltage dependence of inactivation shown before (open squares) and after 10  $\mu$ M PD-11807 (open circles) for I639A (A), C643A (B), F656T (C), and L622C (D) mutant hERG1 channels.

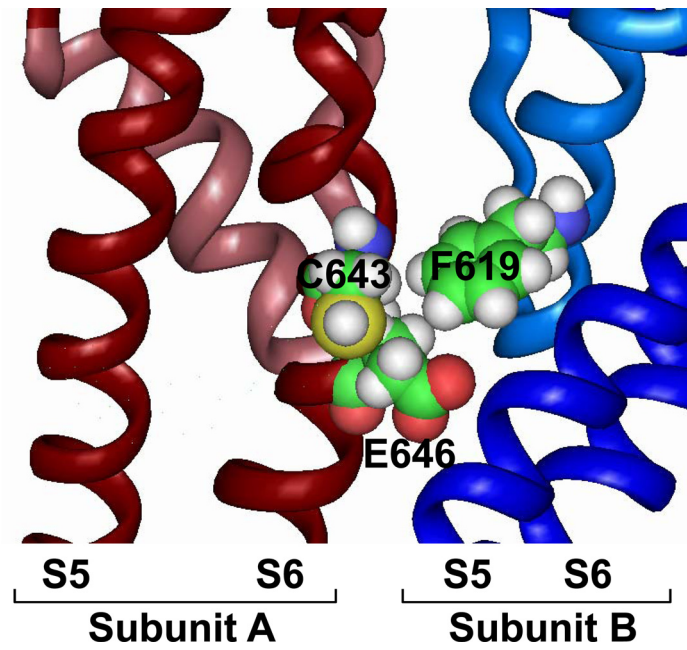

**Fig. S4.** Homology model of the pore module for two adjacent subunits of the L646E hERG1 mutant channel. Glu in this position occludes the binding pocket for PD-118057.

**Table S1. Summary of effects of PD-118057 on the voltage dependence of inactivation for wild-type (WT) and mutant hERG1 channels**

| Channel type                                | Control                              |                   | 10 $\mu$ M PD                                  |                   | $\Delta V_{0.5}$ PD (mV) | N |
|---------------------------------------------|--------------------------------------|-------------------|------------------------------------------------|-------------------|--------------------------|---|
|                                             | $V_{0.5}$ inact (mV)                 | Slope factor (mV) | $V_{0.5}$ inact (mV)                           | Slope factor (mV) |                          |   |
| WT hERG1                                    | $-52.9 \pm 1.8$                      | $20.9 \pm 0.2$    | $-34.2 \pm 2.4$                                | $16.3 \pm 0.3$    | $+18.6 \pm 1.4$          | 7 |
| DMSO Control                                | $-48.5 \pm 6.2$                      | $19.7 \pm 0.3$    | $-48.7 \pm 7.0$                                | $19.2 \pm 0.6$    | $-0.1 \pm 1.5$           | 3 |
| S5 Helix                                    |                                      |                   |                                                |                   |                          |   |
| F557L                                       | $-70.7 \pm 2.3$                      | $32.8 \pm 0.3$    | $-43.5 \pm 5.3$                                | $28.8 \pm 0.9$    | $+27.2 \pm 3.3$          | 3 |
| A558V                                       | $-23.4 \pm 1.8$                      | $19.7 \pm 1.5$    | $-13.2 \pm 1.3$                                | $16.8 \pm 0.2$    | $+10.2 \pm 1.1$          | 3 |
| L559A                                       | $-54.2, -50.4$                       | $21.6, 18.5$      | $-37.6, -31.2$                                 | $17.1, 14.9$      | $+16.6, +19.2$           | 2 |
| I560A                                       | $-36.1 \pm 3.9$                      | $20.7 \pm 1.1$    | $-23.2 \pm 1.1$                                | $17.2 \pm 0.7$    | $+12.9 \pm 2.9$          | 3 |
| A561G                                       | $-24.8 \pm 1.7$                      | $18.4 \pm 0.6$    | $-19.0 \pm 2.4$                                | $15.8 \pm 0.7$    | $+5.8 \pm 1.1$           | 3 |
| H562A, C, K                                 | No expression                        |                   |                                                |                   |                          |   |
| W563A                                       | $-52.7, -63.8$                       | $20.4, 20.5$      | $-39.4, -45.2$                                 | $17.1, 17.3$      | $+13.3, +18.5$           | 2 |
| L564A                                       | $-7.0, -11.0$                        | $16.0, 17.9$      | $+3.7, -2.7$                                   | $13.0, 13.3$      | $+10.7, +8.3$            | 2 |
| A565G                                       | $-38.0 \pm 3.6$                      | $20.1 \pm 1.0$    | $-24.6 \pm 4.0$                                | $16.0 \pm 0.5$    | $+13.5 \pm 0.8$          | 4 |
| C566A                                       | $-43.5 \pm 1.9$                      | $18.6 \pm 0.2$    | $-36.3 \pm 0.7$                                | $16.4 \pm 0.6$    | $+7.1 \pm 1.2$           | 3 |
| I567A                                       | $-42.1, -38.9$                       | $22.4, 21.3$      | $-26.3, -20.2$                                 | $16.6, 14.4$      | $+15.7, +18.7$           | 2 |
| W568A                                       | No expression                        |                   |                                                |                   |                          |   |
| Y569A                                       | $-62.1 \pm 2.6$                      | $21.6 \pm 1.0$    | $-42.0 \pm 3.7$                                | $16.3 \pm 1.4$    | $+20.1 \pm 2.5$          | 3 |
| Pore helix                                  |                                      |                   |                                                |                   |                          |   |
| F619A                                       | $-36.5 \pm 1.0$                      | $16.9 \pm 0.5$    | $-39.2 \pm 0.8$                                | $18.6 \pm 0.6$    | $-2.7 \pm 0.9$           | 5 |
| I622C                                       | $-46.9 \pm 1.3$                      | $20.8 \pm 0.5$    | $-40.8 \pm 2.3$                                | $17.2 \pm 0.7$    | $+6.1 \pm 1.0$           | 5 |
| S6 Helix                                    |                                      |                   |                                                |                   |                          |   |
| I639A                                       | $-69.1 \pm 1.3$                      | $22.5 \pm 0.3$    | $-60.2 \pm 1.1$                                | $20.9 \pm 0.3$    | $+8.9 \pm 1.0$           | 5 |
| F640C                                       | $-40.6 \pm 0.7$                      | $17.9 \pm 0.4$    | $-26.0 \pm 1.2$                                | $14.8 \pm 0.6$    | $+14.6 \pm 0.8$          | 4 |
| S641C                                       | *High K                              |                   |                                                |                   |                          | 3 |
| I642C                                       | $-37.2 \pm 1.5$                      | $15.4 \pm 0.3$    | $-27.2 \pm 1.3$                                | $14.2 \pm 0.8$    | $+10.0 \pm 1.7$          | 3 |
| C643A                                       | $-69.6 \pm 1.5$                      | $24.9 \pm 0.2$    | $-32.6 \pm 2.6$                                | $16.9 \pm 0.2$    | $+37.0 \pm 1.6$          | 5 |
| V644A                                       | $-12.3 \pm 2.9$                      | $15.0 \pm 0.2$    | $-4.5 \pm 2.4$                                 | $14.2 \pm 0.1$    | $+7.8 \pm 0.6$           | 5 |
| M645C                                       | *High K                              |                   |                                                |                   |                          | 2 |
| L646A                                       | $-61.5 \pm 2.6$                      | $21.8 \pm 0.2$    | $-60.0 \pm 2.5$                                | $20.9 \pm 0.2$    | $+1.5 \pm 0.9$           | 5 |
| I647A                                       | $-35.5 \pm 3.2$                      | $18.1 \pm 1.2$    | $-19.1 \pm 2.8$                                | $14.5 \pm 0.7$    | $+16.4 \pm 2.4$          | 5 |
| G648A                                       | *High K                              |                   |                                                |                   |                          | 2 |
| S649A                                       | $-52.5 \pm 2.4$                      | $19.8 \pm 0.8$    | $-35.4 \pm 3.9$                                | $16.0 \pm 0.4$    | $+17.1 \pm 1.9$          | 3 |
| L650A                                       | $-24.0 \pm 5.2$                      | $19.1 \pm 1.6$    | $-13.7 \pm 5.9$                                | $16.7 \pm 1.5$    | $+10.4 \pm 1.5$          | 3 |
| M651A                                       | $-61.9, -58.6$                       | $17.2, 17.7$      | $-44.9, -47.0$                                 | $14.1, 16.1$      | $+17.1, +11.6$           | 2 |
| Y652A                                       | $-38.5 \pm 2.8$                      | $26.2 \pm 2.7$    | $-27.5 \pm 3.7$                                | $21.2 \pm 2.2$    | $+11.0 \pm 1.6$          | 4 |
| A653M                                       | $-27.4 \pm 0.8$                      | $20.7 \pm 0.0$    | $-13.7 \pm 0.4$                                | $15.5 \pm 0.3$    | $+13.7 \pm 1.2$          | 3 |
| S654A                                       | $-45.6, -46.2$                       | $15.7, 16.4$      | $-28.6, -26.3$                                 | $13.4, 12.2$      | $+17.0, +19.9$           | 2 |
| I655A                                       | No expression                        |                   |                                                |                   |                          |   |
| F656T                                       | $-80.9 \pm 4.4$                      | $23.2 \pm 0.2$    | $-49.8 \pm 6.7$                                | $20.4 \pm 0.8$    | $+31.1 \pm 2.3$          | 3 |
| G657A                                       | $-63.1 \pm 1.9$                      | $24.3 \pm 0.4$    | $-43.0 \pm 5.8$                                | $20.8 \pm 1.0$    | $+20.2 \pm 4.0$          | 3 |
| N658A                                       | Not measured, deactivation too rapid |                   |                                                |                   |                          |   |
| V659A                                       | $-21.1$                              | $17.6$            | $-5.7$                                         | $14.3$            | $15.4$                   | 1 |
| S660A                                       | $-40.5$                              | $19.2$            | $-20.6$                                        | $14.4$            | $19.8$                   | 1 |
| A661C                                       | $-48.8, -55.2$                       | $21.2, 21.2$      | $-29.6, -31.2$                                 | $15.1, 13.5$      | $+19.2, +24.0$           | 2 |
| I662A                                       | $-69.6, -63.5$                       | $18.4, 22.0$      | $-55.1, -48.9$                                 | $17.1, 18.1$      | $+14.4, +14.6$           | 2 |
| I663A                                       | $-60, -64.0$                         | $21.2, 16.0$      | $-36.4, -49.8$                                 | $16.8, 15.6$      | $23.6, 14.1$             | 2 |
| Q664A                                       | $-48.0 \pm 2.0$                      | $21.2 \pm 0.2$    | $-22.4 \pm 2.2$                                | $17.6 \pm 0.3$    | $+25.6 \pm 3.1$          | 3 |
| R665A                                       | $-65.2$                              | $21.7$            | $-48.4$                                        | $18.9$            | $16.8$                   | 1 |
| L666A                                       | $-41.0 \pm 2.3$                      | $22.9 \pm 2.4$    | $-26.1 \pm 2.0$                                | $16.3 \pm 1.6$    | $+14.9 \pm 1.0$          | 4 |
| Y667A                                       | $-53.5$                              | $21.2$            | $-34.8$                                        | $16.7$            | $18.8$                   | 1 |
| *High K <sup>+</sup> extracellular solution |                                      |                   |                                                |                   |                          |   |
|                                             |                                      |                   | % Increase in hERG1 tail currents at $-140$ mV |                   |                          | N |
| WT hERG1                                    |                                      |                   | $36 \pm 3.1$                                   |                   |                          | 3 |
| S641C                                       |                                      |                   | $67 \pm 14$                                    |                   |                          | 3 |
| M645C                                       |                                      |                   | $148, 111$                                     |                   |                          | 2 |
| G648A                                       |                                      |                   | $39, 48$                                       |                   |                          | 2 |

## Other Supporting Information

[Dataset S1](#)
